# Supplementary material
Source: publisher figshare collection journal article supplement (https://acs.figshare.com/ndownloader/files/7312997)
Supplement: Supplementary file 1 [file 7312997]

*Supporting Information*

**Two Lanthanide Metal-Organic Frameworks as Remarkably Selective and Sensitive Bifunctional Luminescence Sensor for Metal Ions and Small Organic Molecules**

*Wei Yan, Chuanlei Zhang, Shuguang Chen, Lijuan Han and Hegen Zheng\**

State Key Laboratory of Coordination Chemistry, School of Chemistry and Chemical Engineering, Collaborative Innovation Center of Advanced Microstructures, Nanjing University, Nanjing 210023, P. R. China

Corresponding Authors

\*E-mail: [zhenghg@nju.edu.cn](mailto:zhenghg@nju.edu.cn)

## Contents

1. Experimental section.
2. Selected bond lengths (Å) and angles (deg) for complexes 1 and 2.
3. Structural drawing for complexes 1.
4. Powder X-ray diffraction patterns of complexes 1 and 2.
5. The TGA diagrams of complexes 1 and 2.
6. Solid-state photoluminescent spectra of 1 and 2.
7. IR spectra of complexes 1-2 and related ligands.
8. The decay lifetime of compound 1 and 2.
9. The changes of the luminescence intensity upon the addition of analyte.
10. The quenching relationship between nitromethane and MOFs 1 and 2.
11. The N1s XPS results of complexes 1-2 and after addition of  $\text{Fe}^{3+}$ .
12. The UV-Vis spectra of ligands, NM, and complexes 1-2 in DMF solution.
13. The ICP results of complexes 1-2 after treated with  $\text{Fe}^{3+}$  for 12 hours.
14. The detection limit table of selected luminescent Ln-MOFs materials for  $\text{Fe}^{3+}$ .

## 1. Experimental section.

**Materials and measurements.** Reagents and solvents employed were commercially available. Ligand H<sub>2</sub>L was synthesized by palladium-catalyzed cross-coupling reaction and oxidation reaction. IR absorption spectra of the compounds **1** - **2** were recorded in the range of 400–4000 cm<sup>-1</sup> on a Nicolet (Impact 410) spectrometer with KBr pellets (5 mg of sample in 500 mg of KBr). C, H and N analyses were carried out with a Perkin Elmer 240C elemental analyzer. Powder X-ray diffraction (PXRD) measurements were performed on a Bruker D8 Advance X-ray diffractometer using Mo-K $\alpha$  radiation ( $\lambda = 0.71073 \text{ \AA}$ ), in which the X-ray tube was operated at 40 kV and 40 mA. The as-synthesized samples were characterized by thermogravimetric analysis (TGA) on a Perkin Elmer thermogravimetric analyzer Pyris 1 TGA up to 1073 K using a heating rate of 10 K min<sup>-1</sup> under N<sub>2</sub> atmosphere. Fluorescence spectra for the compounds were conducted with a F-4600 FL Spectrophotometer at room temperature.

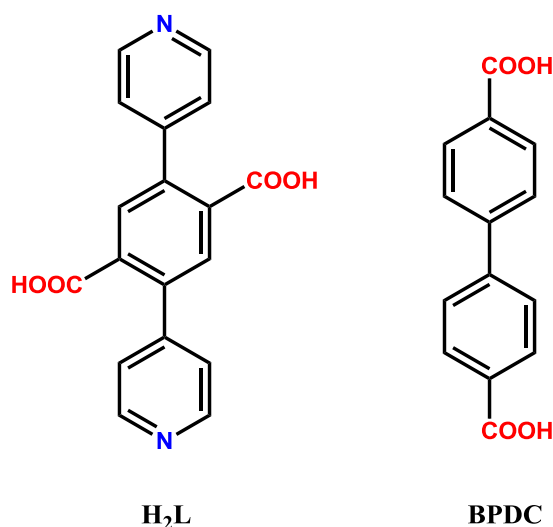

**Scheme S1.** Pyridine-Carboxylate, and BPDC Ligand.

**Synthesis of complex 1.** A mixture of H<sub>2</sub>O (2 ml) containing the H<sub>2</sub>L (9.6 mg, 0.03 mmol), BPDC (3.4mg, 0.015mmol) and Eu(NO<sub>3</sub>)<sub>2</sub> 6H<sub>2</sub>O (93.8mg, 0.21 mmol) was mixed in a Teflon vessel within the autoclave. The vessel was heated at 180 °C for 96 h and then cooled to room temperature. Large quantities of yellow crystals were obtained and crystals were filtered off, washed with mother liquid, and dried under ambient conditions. The yellow crystals of **1** were collected in 38% yield (based on H<sub>2</sub>L ligand). Elemental analysis calcd. for C<sub>25</sub>H<sub>17</sub>EuN<sub>3</sub>O<sub>10</sub> (**1**): C, 44.72%; H, 2.53%;

N, 6.26%, Found: C, 44.68%; H, 2.49%, N, 6.28%. The IR spectra of complex **1** is shown in the Figure S6.

**Synthesis of complex 2.** A mixture of H<sub>2</sub>O (2 ml) containing the H<sub>2</sub>L (9.6 mg, 0.03 mmol), BPDC (3.4mg, 0.015mmol) and Tb(NO<sub>3</sub>)<sub>2</sub> 6H<sub>2</sub>O (68mg, 0.15 mmol) was mixed in a Teflon vessel within the autoclave. The vessel was heated at 180 °C for 96 h and then cooled to room temperature. Large quantities of yellow crystals were obtained and crystals were filtered off, washed with mother liquid, and dried under ambient conditions. The yellow crystals of **2** were collected in 47% yield (based on H<sub>2</sub>L ligand). Elemental analysis calcd. for C<sub>25</sub>H<sub>17</sub>TbN<sub>3</sub>O<sub>10</sub> (**2**): C, 44.27%; H, 2.51%; N, 6.19%, Found: C, 44.24%; H, 2.52%, N, 6.20%. The IR spectra of complex **2** is shown in the Figure S7.

**X-ray crystallography.** Single crystals of complexes **1-2** were tested on a Bruker SMART APEX CCD diffractometer using graphite monochromated Mo K $\alpha$  radiation ( $\lambda$  = 0.71073 Å) at 296 K. From the data reduction to the structure determination, the follow procedures were used: the International Tables for X-ray Crystallography,<sup>1</sup> SAINT,<sup>2</sup> SADABS,<sup>3</sup> XPREP,<sup>4</sup> SHELXTL-97<sup>5</sup> and SHELXTL-97 program<sup>6</sup> package.

## 2. Selected bond lengths (Å) and angles (deg) for complexes 1-2.

**Table S1.** Crystal data and structural refinement parameters of complexes **1-2**.

| Complexes         | <b>1</b>                                                         | <b>2</b>                                                         |
|-------------------|------------------------------------------------------------------|------------------------------------------------------------------|
| Empirical formula | C <sub>25</sub> H <sub>17</sub> EuN <sub>3</sub> O <sub>10</sub> | C <sub>25</sub> H <sub>17</sub> TbN <sub>3</sub> O <sub>10</sub> |
| Formula weight    | 671.38                                                           | 678.34                                                           |
| Crystal system    | Monoclinic                                                       | Monoclinic                                                       |
| Space group       | <i>P</i> 2(1)/ <i>n</i>                                          | <i>P</i> 2(1)/ <i>n</i>                                          |
| <i>a</i> / Å      | 10.6381(13)                                                      | 10.6273(10)                                                      |
| <i>b</i> / Å      | 18.837(2)                                                        | 18.7534(17)                                                      |
| <i>c</i> / Å      | 12.0604(15)                                                      | 11.9852(11)                                                      |
| $\alpha$ / °      | 90                                                               | 90                                                               |
| $\beta$ / °       | 94.139(2)                                                        | 94.0280(10)                                                      |

|                                                             |                |                |
|-------------------------------------------------------------|----------------|----------------|
| $\gamma / ^\circ$                                           | 90             | 90             |
| $V / \text{\AA}^3$                                          | 2410.5(5)      | 2382.7(4)      |
| $Z$                                                         | 4              | 4              |
| $D_{\text{calcd}} / \text{g cm}^{-3}$                       | 1.850          | 1.891          |
| $\mu / \text{mm}^{-1}$                                      | 2.669          | 3.035          |
| $F(000)$                                                    | 1324           | 1332           |
| $\theta$ min-max / $^\circ$                                 | 2.01, 25.00    | 2.17, 27.44    |
| Tot., uniq. data                                            | 17555, 4231    | 20948, 5399    |
| $R(\text{int})$                                             | 0.0433         | 0.0331         |
| Nref, Npar                                                  | 4, 360         | 3, 354         |
| $R_1, wR_2 [I > 2\sigma(I)]$                                | 0.0272, 0.0691 | 0.0234, 0.0608 |
| GOF on $F^2$                                                | 1.048          | 1.049          |
| Min. and max resd dens ( $\text{e} \cdot \text{\AA}^{-3}$ ) | -1.096, 1.255  | -0.894, 1.299  |

**Table S2.** Selected bond lengths ( $\text{\AA}$ ) and angles (deg) for complexes **1-2**.

| Complex 1           |           |                   |           |
|---------------------|-----------|-------------------|-----------|
| Eu(1)-O(3)          | 2.329(3)  | Eu(1)-O(4)#3      | 2.350(2)  |
| Eu(1)-O(5)#4        | 2.405(2)  | Eu(1)-O(2)        | 2.422(2)  |
| Eu(1)-O(1)          | 2.482(3)  | Eu(1)-O(7)        | 2.502(3)  |
| Eu(1)-O(8)          | 2.504(3)  | Eu(1)-O(6)#5      | 2.511(2)  |
| Eu(1)-O(5)#5        | 2.610(2)  | O(5)-Eu(1)#6      | 2.405(2)  |
| O(5)-Eu(1)#2        | 2.610(2)  | O(6)-Eu(1)#2      | 2.511(2)  |
| O(3)-Eu(1)-O(4)#3   | 137.50(9) | O(3)-Eu(1)-O(5)#4 | 74.10(8)  |
| O(4)#3-Eu(1)-O(5)#4 | 75.65(9)  | O(3)-Eu(1)-O(2)   | 128.83(9) |
| O(4)#3-Eu(1)-O(2)   | 91.40(8)  | O(5)#4-Eu(1)-O(2) | 148.99(8) |

|                     |            |                     |            |
|---------------------|------------|---------------------|------------|
| O(3)-Eu(1)-O(1)     | 76.27(9)   | O(4)#3-Eu(1)-O(1)   | 138.56(9)  |
| O(5)#4-Eu(1)-O(1)   | 145.79(9)  | O(2)-Eu(1)-O(1)     | 52.91(8)   |
| O(3)-Eu(1)-O(7)     | 75.19(13)  | O(4)#3-Eu(1)-O(7)   | 126.28(11) |
| O(5)#4-Eu(1)-O(7)   | 78.44(11)  | O(2)-Eu(1)-O(7)     | 87.46(12)  |
| O(1)-Eu(1)-O(7)     | 77.78(11)  | O(3)-Eu(1)-O(8)     | 122.36(11) |
| O(4)#3-Eu(1)-O(8)   | 77.15(11)  | O(5)#4-Eu(1)-O(8)   | 75.96(9)   |
| O(2)-Eu(1)-O(8)     | 73.71(9)   | O(1)-Eu(1)-O(8)     | 106.74(10) |
| O(7)-Eu(1)-O(8)     | 51.11(12)  | O(3)-Eu(1)-O(6)#5   | 97.22(9)   |
| O(4)#3-Eu(1)-O(6)#5 | 76.79(9)   | O(5)#4-Eu(1)-O(6)#5 | 125.08(8)  |
| O(2)-Eu(1)-O(6)#5   | 77.19(9)   | O(1)-Eu(1)-O(6)#5   | 75.23(10)  |
| O(7)-Eu(1)-O(6)#5   | 152.99(11) | O(8)-Eu(1)-O(6)#5   | 140.03(10) |
| O(3)-Eu(1)-O(5)#5   | 69.53(9)   | O(4)#3-Eu(1)-O(5)#5 | 75.10(8)   |
| O(5)#4-Eu(1)-O(5)#5 | 76.97(8)   | O(2)-Eu(1)-O(5)#5   | 127.38(8)  |
| O(1)-Eu(1)-O(5)#5   | 108.05(9)  | O(7)-Eu(1)-O(5)#5   | 141.24(12) |
| O(8)-Eu(1)-O(5)#5   | 145.09(10) | O(6)#5-Eu(1)-O(5)#5 | 50.33(7)   |
| <b>Complex 2</b>    |            |                     |            |
| O(1)-Tb(1)          | 2.393(2)   | O(2)-Tb(1)          | 2.465(2)   |
| O(3)-Tb(1)#3        | 2.3733(19) | O(3)-Tb(1)#1        | 2.585(2)   |
| O(4)-Tb(1)#1        | 2.480(2)   | O(5)-Tb(1)          | 2.299(2)   |
| O(6)-Tb(1)#4        | 2.324(2)   | O(7)-Tb(1)          | 2.470(3)   |
| O(8)-Tb(1)          | 2.482(2)   | Tb(1)-O(3)#6        | 2.585(2)   |
| Tb(1)-O(3)#5        | 2.3733(19) | Tb(1)-O(4)#6        | 2.480(2)   |
| O(5)-Tb(1)-O(6)#4   | 138.05(8)  | O(5)-Tb(1)-O(3)#5   | 74.35(7)   |
| O(6)#4-Tb(1)-O(3)#5 | 76.09(7)   | O(5)-Tb(1)-O(1)     | 129.07(7)  |
| O(6)#4-Tb(1)-O(1)   | 90.62(7)   | O(3)#5-Tb(1)-O(1)   | 148.37(7)  |

|                     |           |                     |            |
|---------------------|-----------|---------------------|------------|
| O(5)-Tb(1)-O(2)     | 76.12(7)  | O(6)#4-Tb(1)-O(2)   | 138.18(8)  |
| O(3)#5-Tb(1)-O(2)   | 145.72(8) | O(1)-Tb(1)-O(2)     | 53.32(7)   |
| O(5)-Tb(1)-O(7)     | 75.09(11) | O(6)#4-Tb(1)-O(7)   | 126.60(10) |
| O(3)#5-Tb(1)-O(7)   | 78.57(10) | O(1)-Tb(1)-O(7)     | 87.21(10)  |
| O(2)-Tb(1)-O(7)     | 77.35(10) | O(5)-Tb(1)-O(4)#6   | 97.28(8)   |
| O(6)#4-Tb(1)-O(4)#6 | 76.79(8)  | O(3)#5-Tb(1)-O(4)#6 | 125.66(7)  |
| O(1)-Tb(1)-O(4)#6   | 77.06(7)  | O(2)-Tb(1)-O(4)#6   | 75.02(8)   |
| O(7)-Tb(1)-O(4)#6   | 152.35(9) | O(5)-Tb(1)-O(8)     | 122.44(9)  |
| O(6)#4-Tb(1)-O(8)   | 76.95(9)  | O(3)#5-Tb(1)-O(8)   | 75.64(7)   |
| O(1)-Tb(1)-O(8)     | 73.42(8)  | O(2)-Tb(1)-O(8)     | 106.80(9)  |
| O(7)-Tb(1)-O(8)     | 51.42(11) | O(4)#6-Tb(1)-O(8)   | 139.85(8)  |
| O(5)-Tb(1)-O(3)#6   | 69.56(8)  | O(6)#4-Tb(1)-O(3)#6 | 75.27(7)   |
| O(3)#5-Tb(1)-O(3)#6 | 76.97(7)  | O(1)-Tb(1)-O(3)#6   | 127.77(7)  |
| O(2)-Tb(1)-O(3)#6   | 108.34(8) | O(4)#6-Tb(1)-O(3)#6 | 50.89(6)   |

Symmetry Codes: for **1**: #1 =  $-x + 2, -y, -z + 1$ , #2 =  $x - 1/2, -y + 1/2, z + 1/2$ , #3 =  $-x + 1, -y, -z$ , #4 =  $-x + 1/2, y - 1/2, -z + 1/2$ , #5 =  $x + 1/2, -y + 1/2, z - 1/2$ , #6 =  $-x + 1/2, y + 1/2, -z + 1/2$ ; for **2**: #1 =  $x - 1/2, -y + 1/2, z + 1/2$ , #2 =  $-x + 2, -y, -z + 2$ , #3 =  $-x + 1/2, y + 1/2, -z + 3/2$ , #4 =  $-x + 1, -y, -z + 1$ , #5 =  $-x + 1/2, y - 1/2, -z + 3/2$ , #6 =  $x + 1/2, -y + 1/2, z - 1/2$ .

### 3. Structural drawing for complexes 1-3.

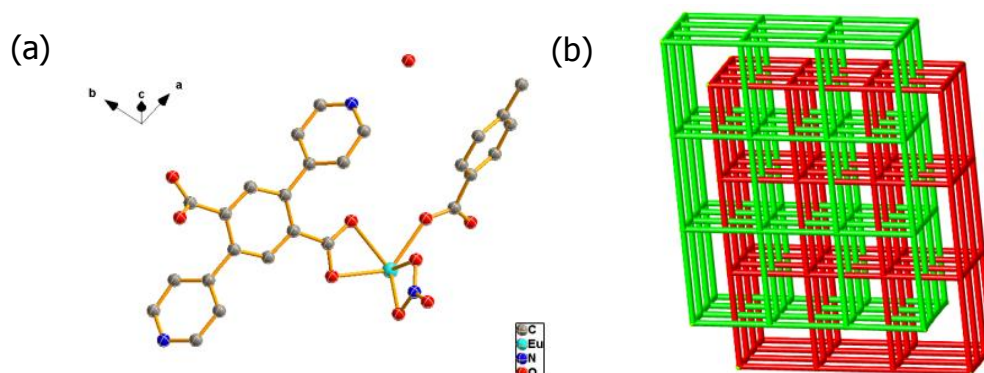

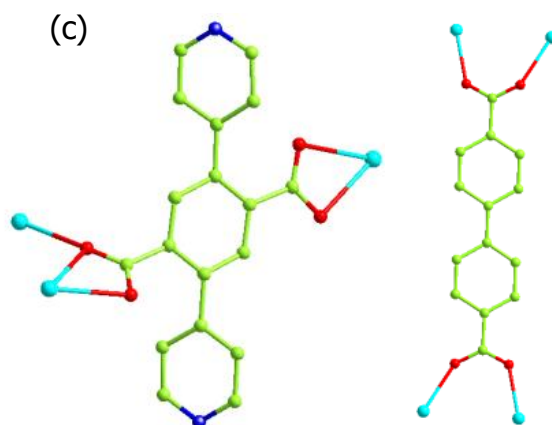

**Figure S1** (a) Coordination environment of **1**. Symmetry code: #1 =  $-x + 2, -y, -z + 1$ , #2 =  $x - 1/2, -y + 1/2, z + 1/2$ , #3 =  $-x + 1, -y, -z$ , #4 =  $-x + 1/2, y - 1/2, -z + 1/2$ , #5 =  $x + 1/2, -y + 1/2, z - 1/2$ , #6 =  $-x + 1/2, y + 1/2, -z + 1/2$ . (b) Topological representation of **1**. (c) The coordination modes of L ligand (left) and BPDC ligand (right).

#### 4. Powder X-ray diffraction patterns of complexes 1-2.

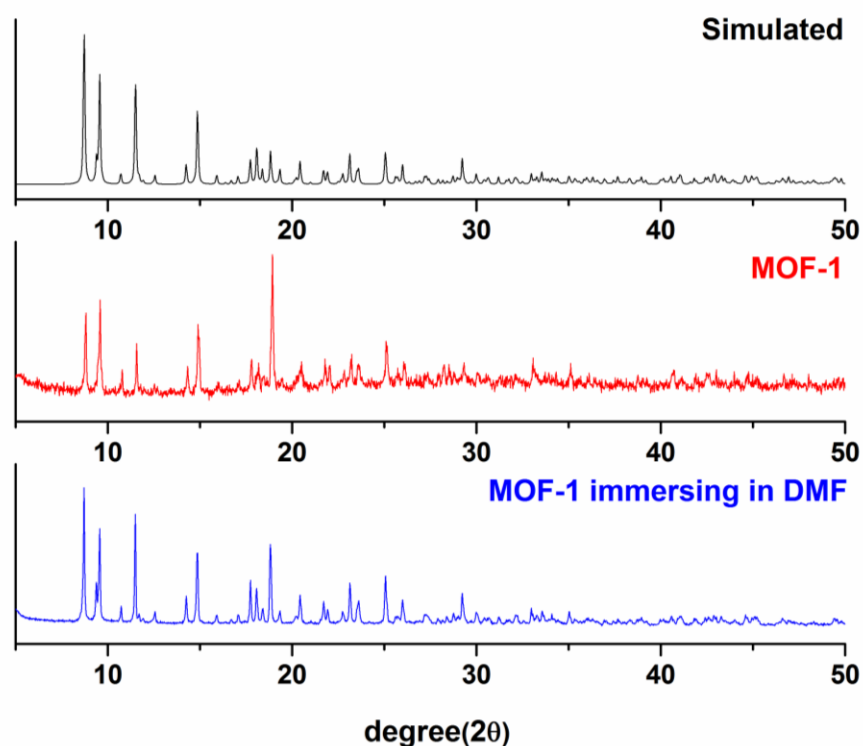

**Figure S2** Powder X-ray diffraction patterns of complex **1**.



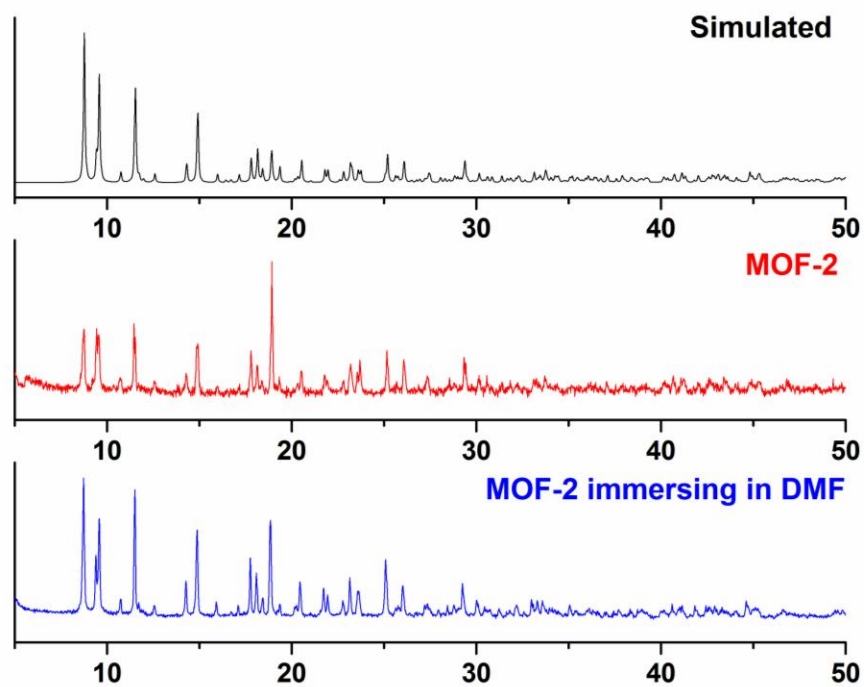

**Figure S3** Powder X-ray diffraction patterns of complex **2**.

## 5. IR spectra of complexes 1-2 and related ligands.

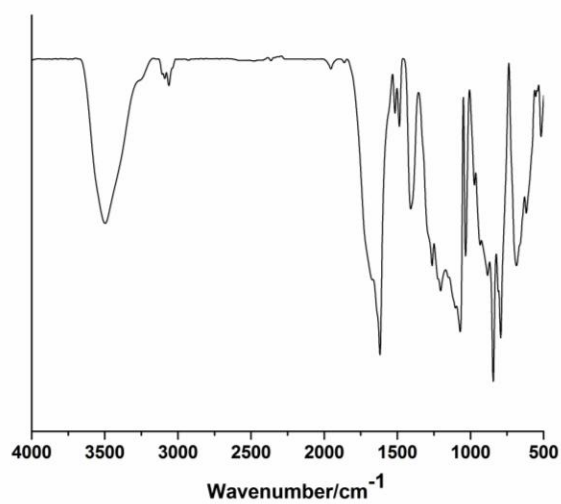

**Figure S4** IR spectra of H<sub>2</sub>L ligand.

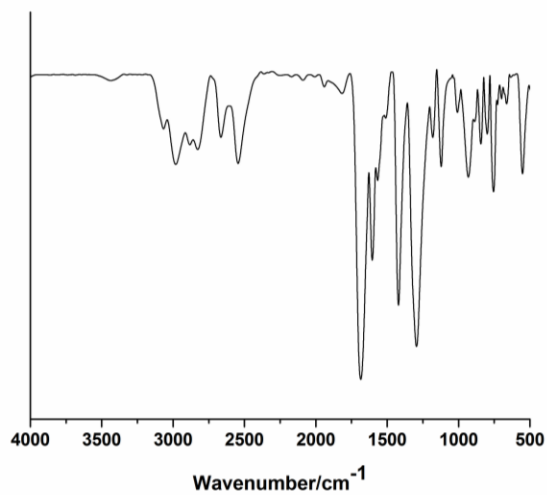

**Figure S5** IR spectra of BPDC ligand.

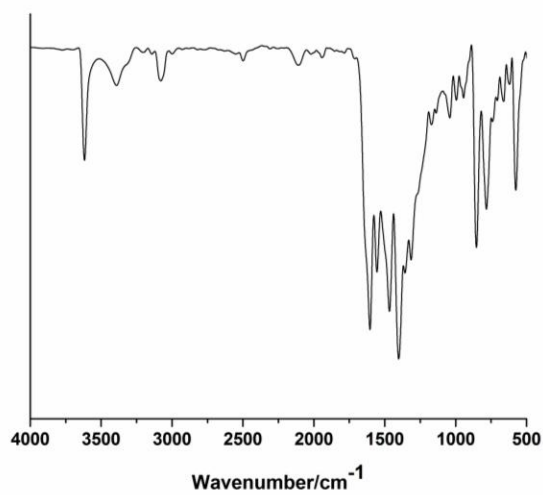

**Figure S6** IR spectra of complex 1.

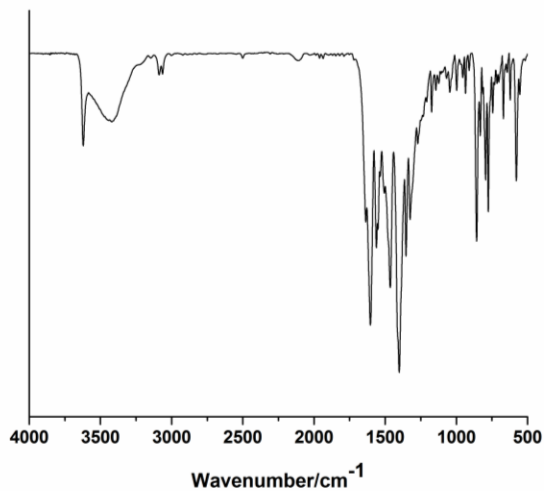

**Figure S7** IR spectra of complex 2.

## 6. Solid-state photoluminescent spectra of 1 and 2.

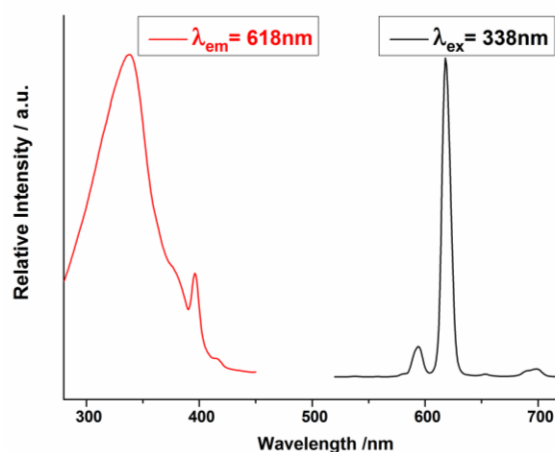

Figure S8 Solid-state photoluminescent spectra of 1.

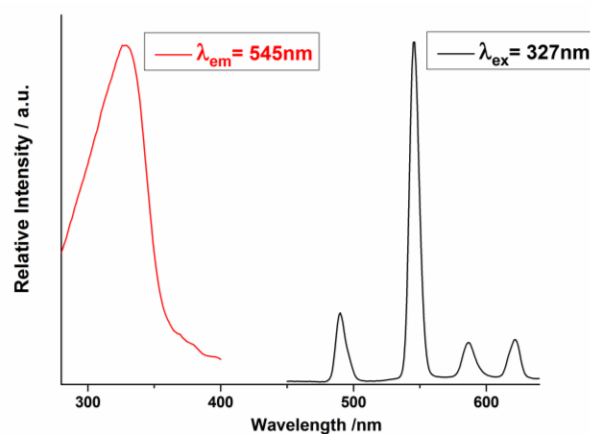

Figure S9 Solid-state photoluminescent spectra of 2.

## 7. The TGA diagrams of complexes 1-2.

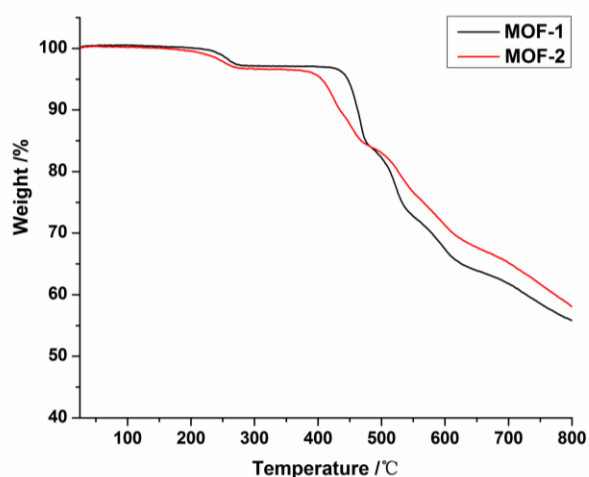

Figure S10 The TGA diagrams of complexes 1-2.

## 8. The decay lifetime of compound 1 and 2.

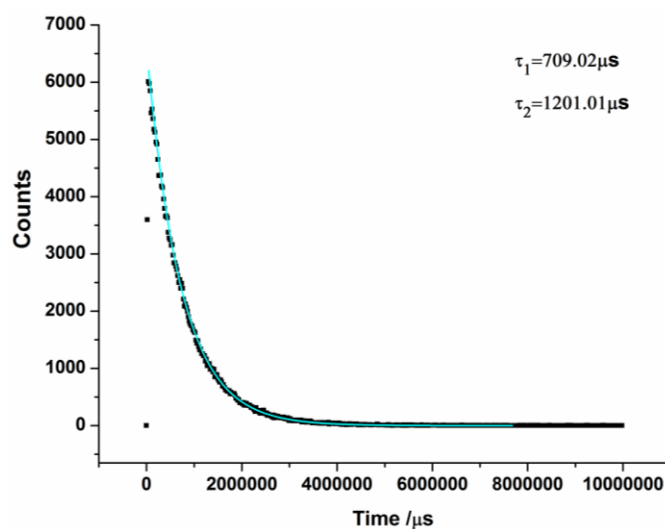

**Figure S11** The fitted decay curve for complex **1** in the solid state. The sample was excited at 335 nm. Blank circles: experimental data; Solid line: fitted by Fit =  $A+B_1 \times \exp(-t/\tau_1)+B_2 \times \exp(-t/\tau_2)$ .

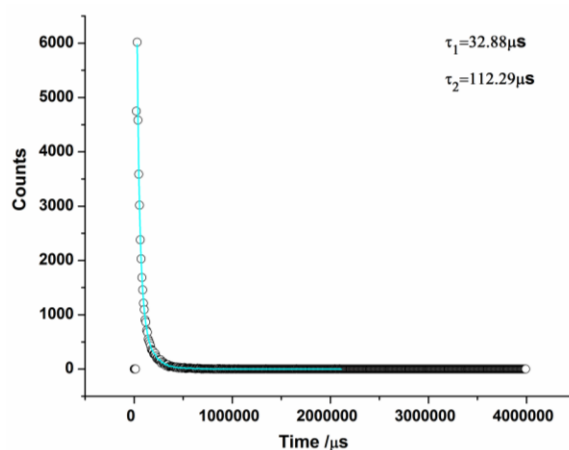

**Figure S12** The fitted decay curve for complex **2** in the solid state. The sample was excited at 327 nm. Blank circles: experimental data; Solid line: fitted by Fit =  $A+B_1 \times \exp(-t/\tau_1)+B_2 \times \exp(-t/\tau_2)$ .

## 9. The changes of the luminescence intensity upon the addition of analyte.

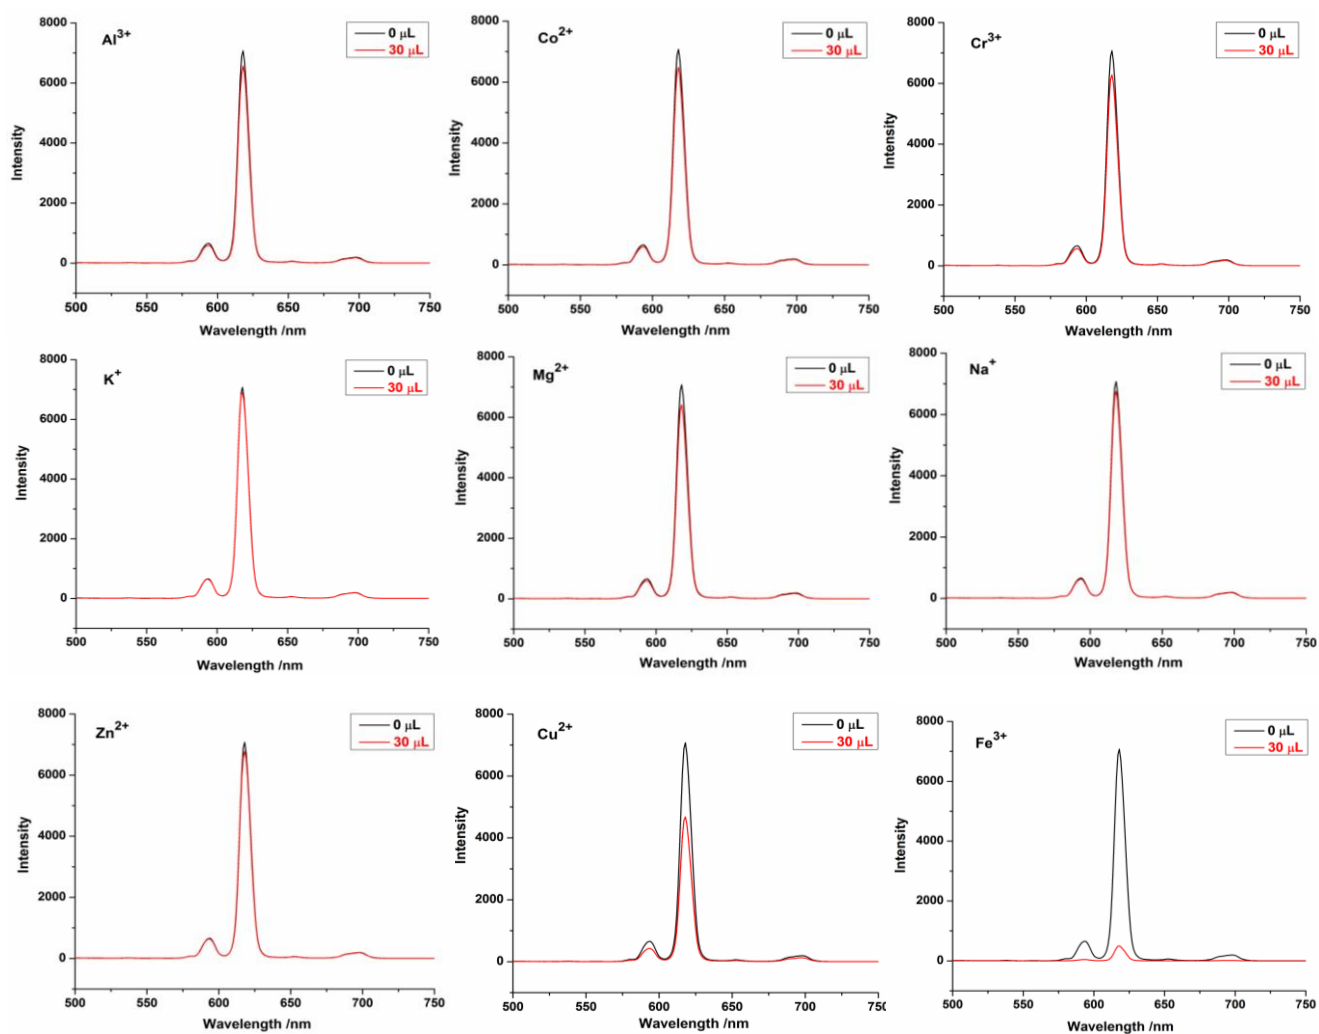

**Figure S13** The fluorescence spectra of MOF-1 in DMF solution upon the addition of  $10^{-2}$  mol/L of various metal ions.

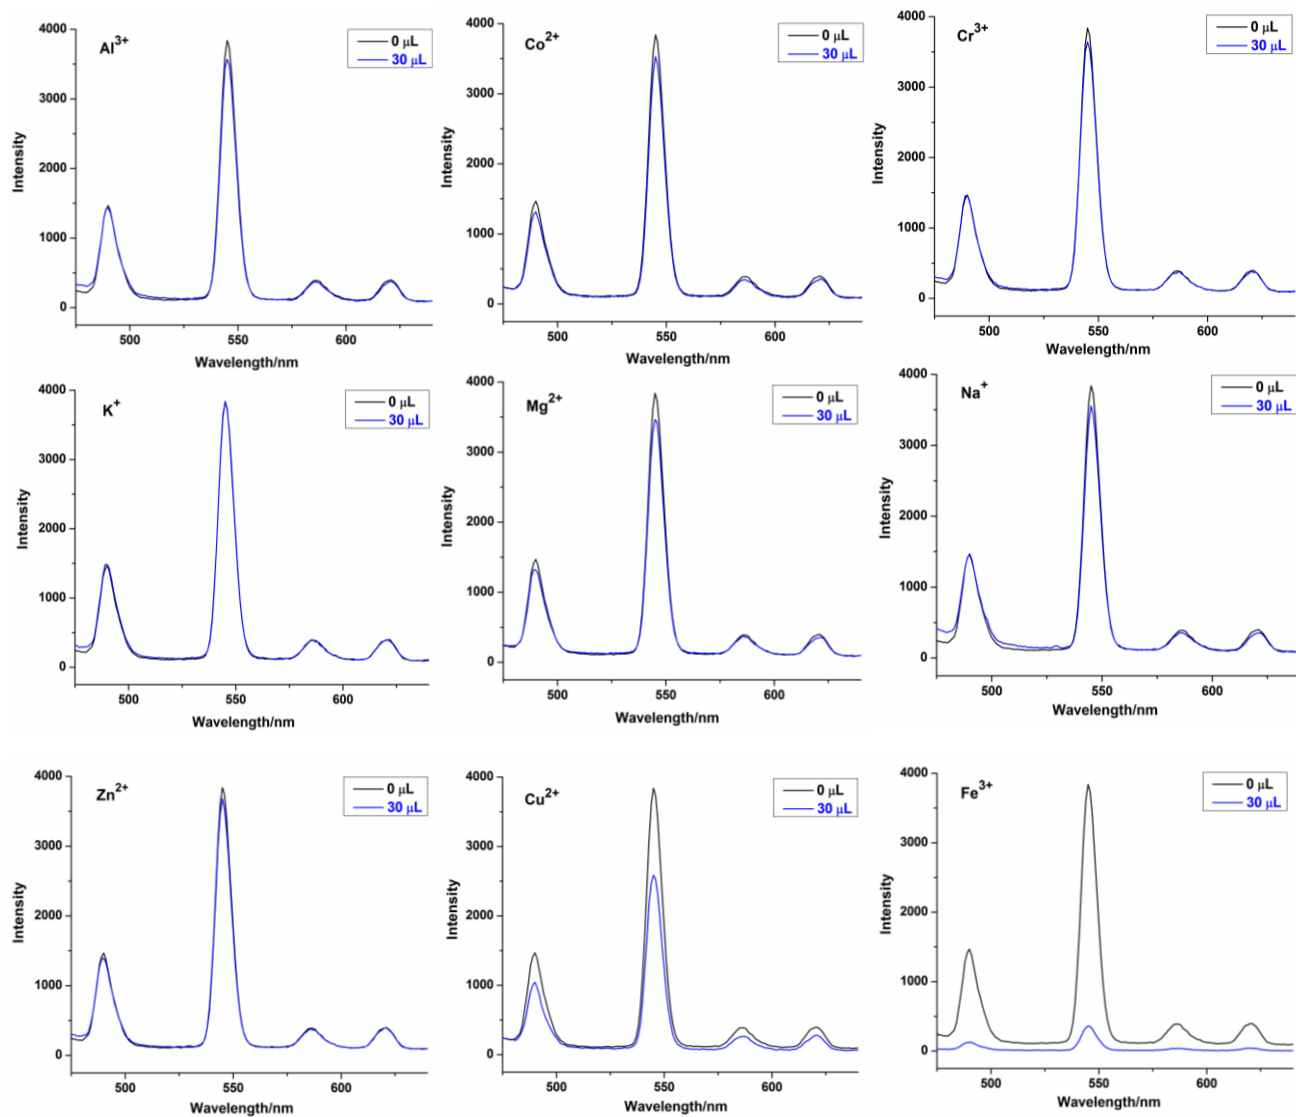

**Figure S14** The fluorescence spectra of MOF-2 in DMF solution upon the addition of  $10^{-2}$  mol/L of various metal ions.

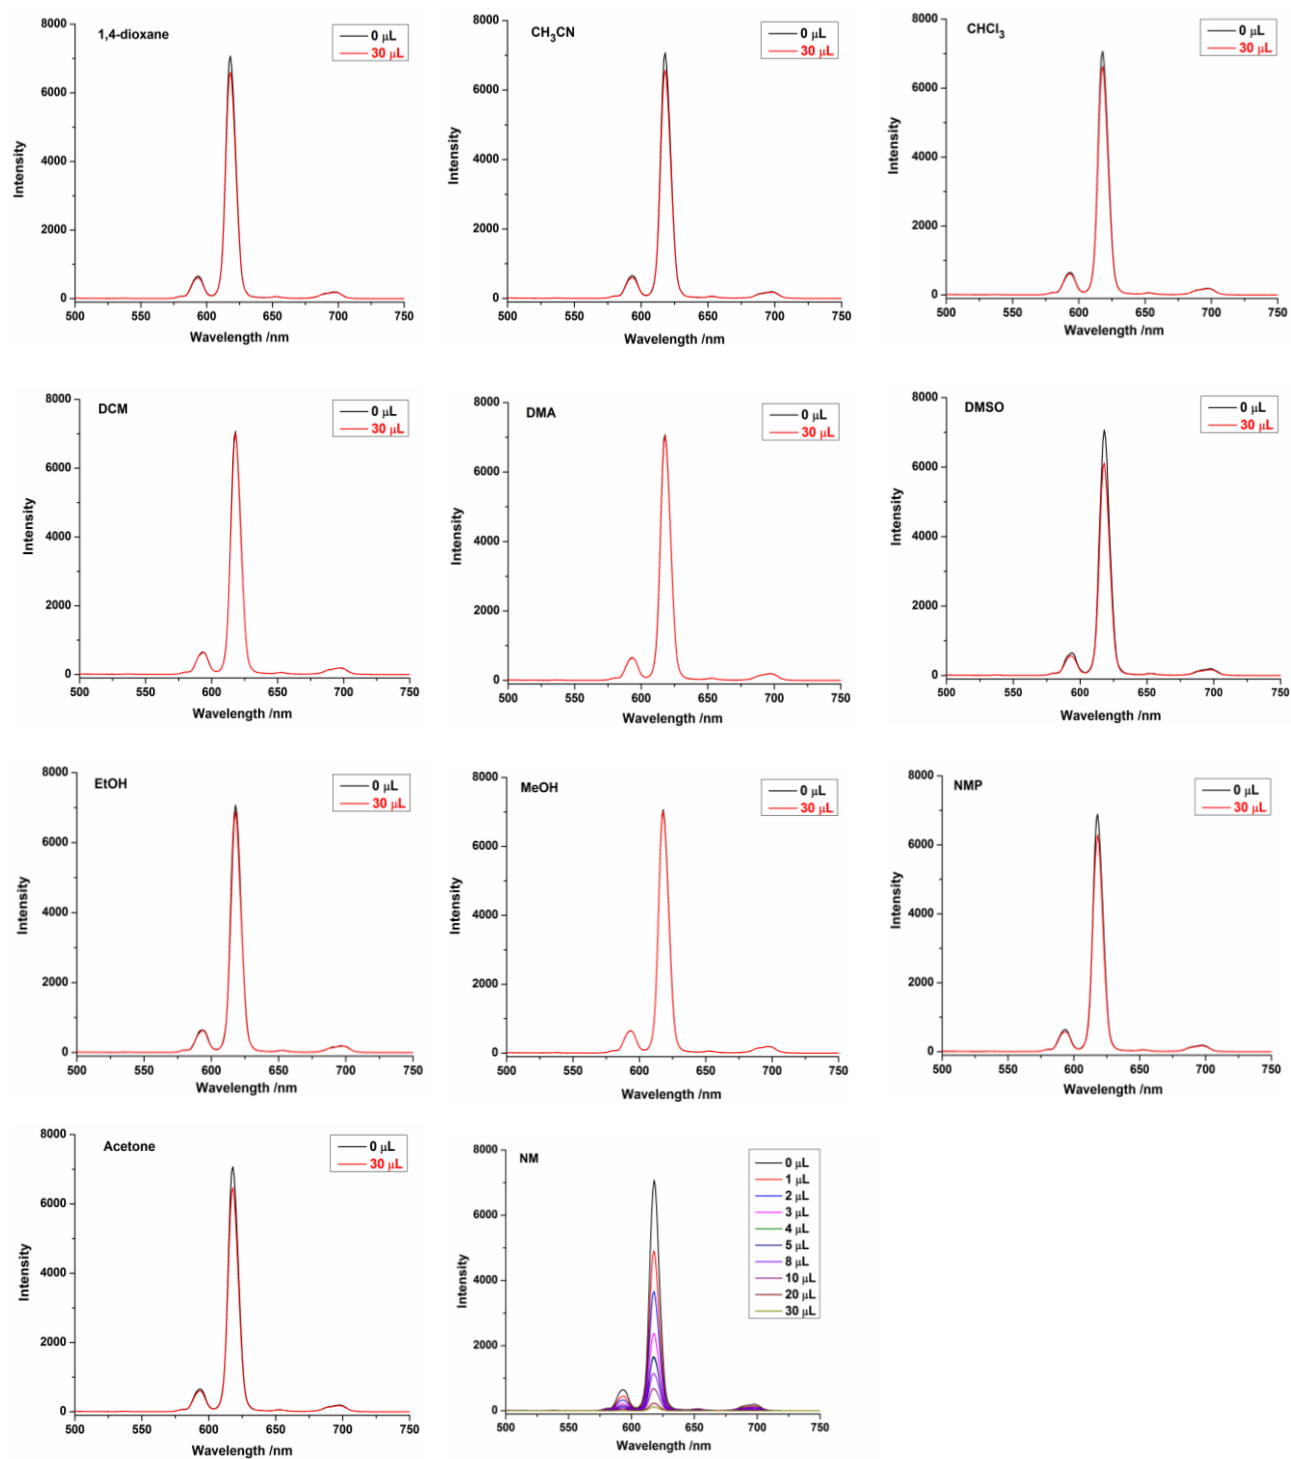

**Figure S15** The fluorescence spectra of MOF-1 in DMF solution upon the addition of various solvents.

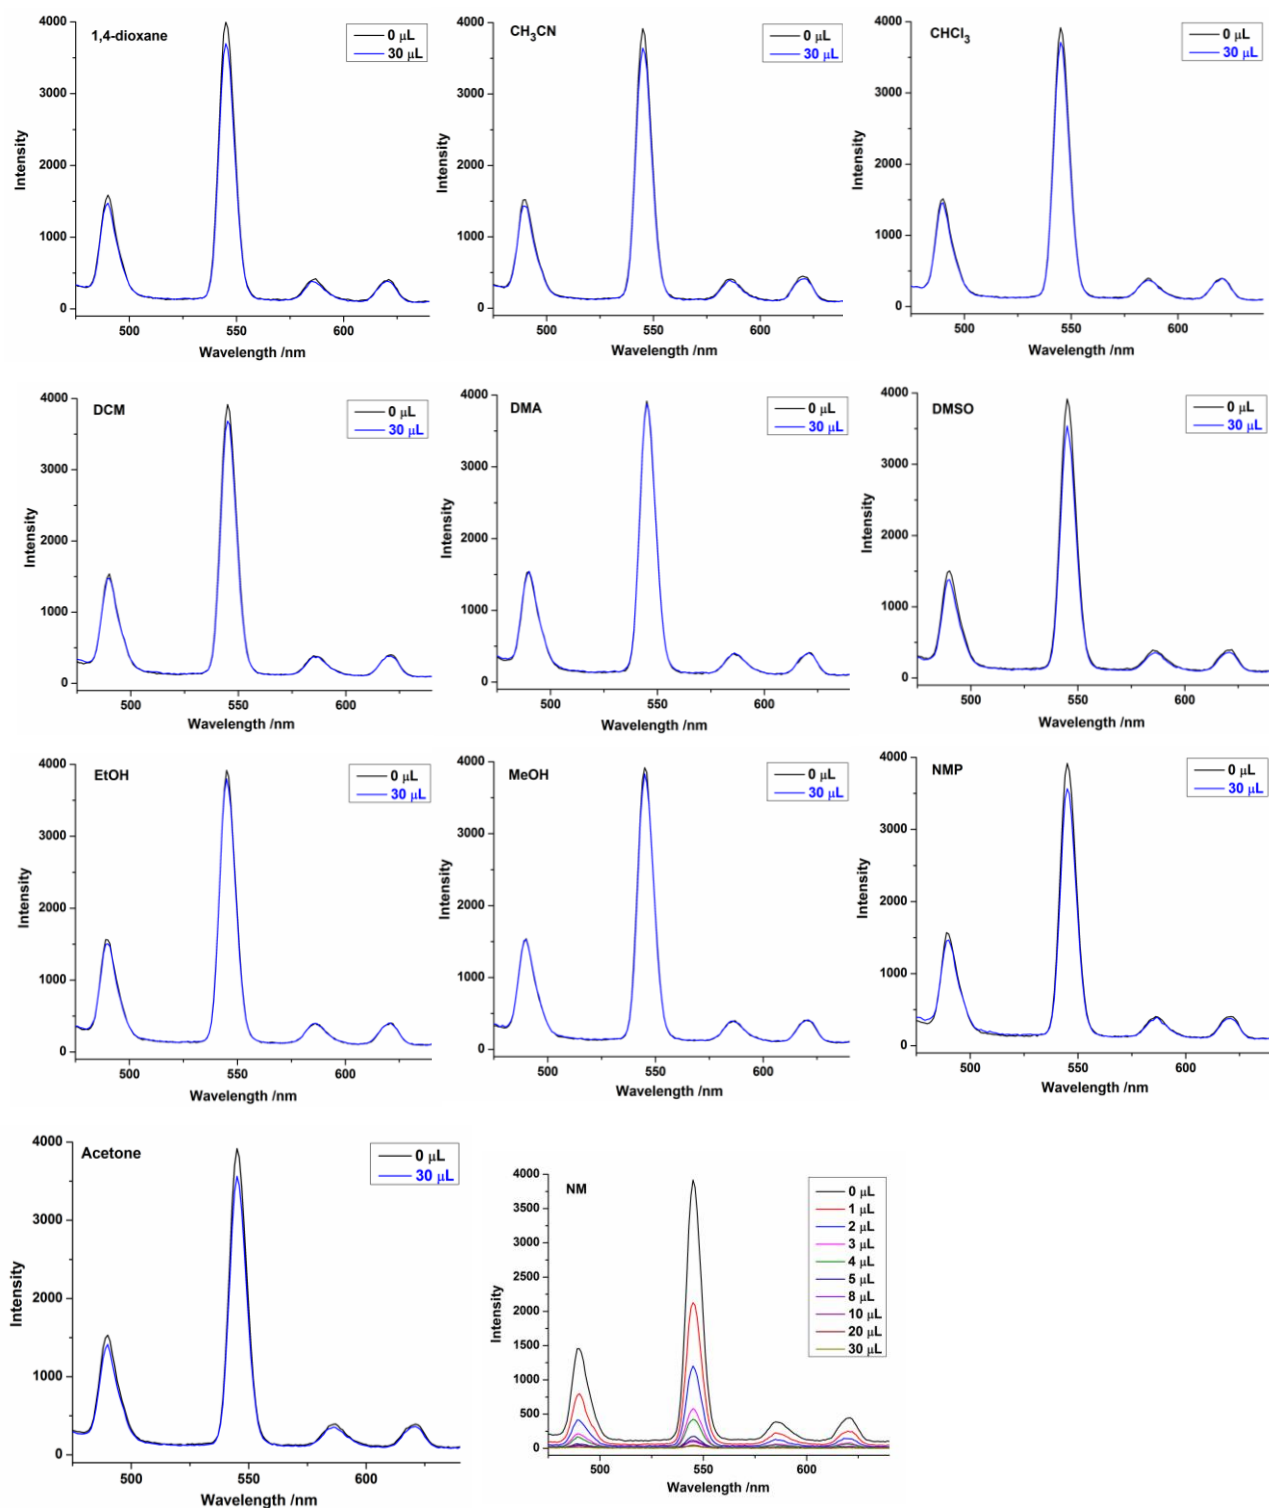

**Figure S16** The fluorescence spectra of MOF-2 in DMF solution upon the addition of various solvents.



## 10. The quenching relationship between nitromethane and MOFs 1 and 2.

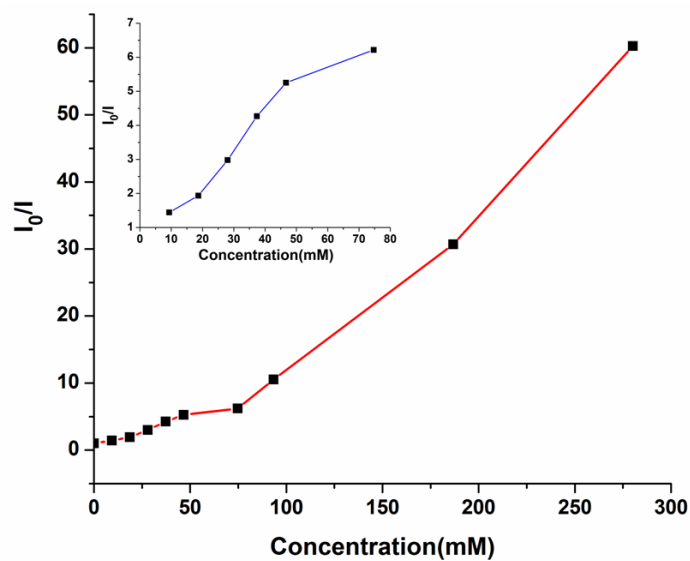

**Figure S17.** SV curve for **1** by gradual addition of nitromethane. The inset demonstrates the quenching relationship at low concentrations of nitromethane.

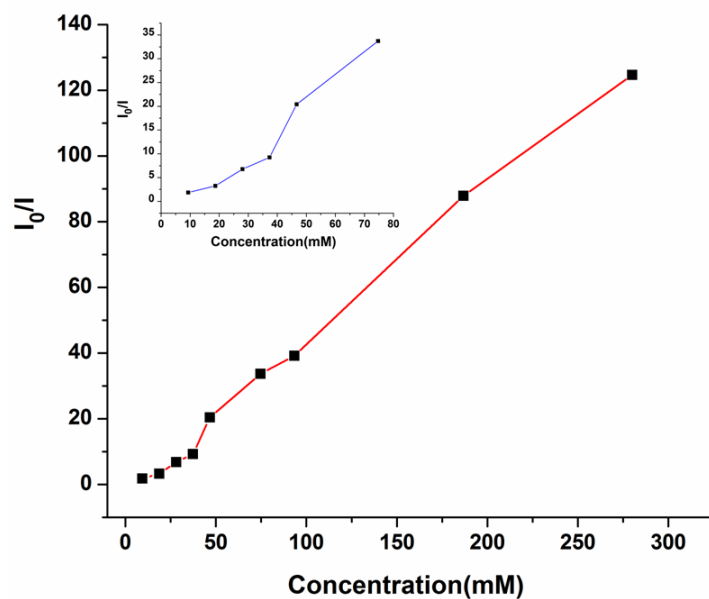

**Figure S18.** SV curve for **2** by gradual addition of nitromethane. The inset demonstrates the quenching relationship at low concentrations of nitromethane.

## 11. The N1s XPS results of complexes 1-2 and after addition of $\text{Fe}^{3+}$

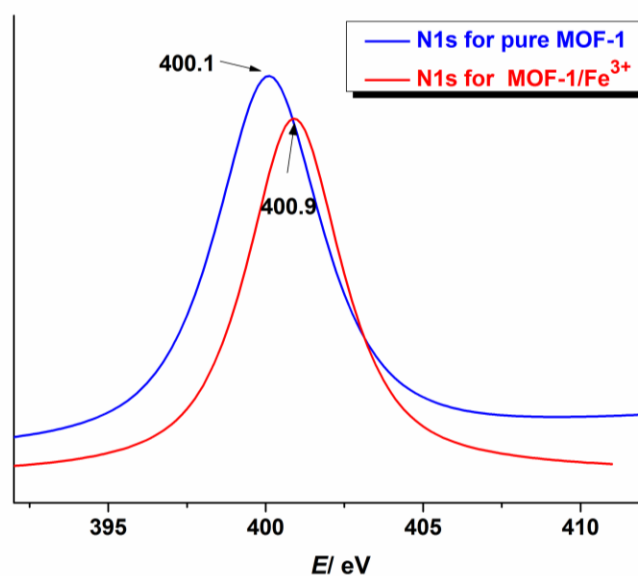

**Figure S19.** XPS spectra of the **1** (blue) and  $\text{Fe}^{3+}$ -incorporated **1** (red) activated in 0.01 mol/L DMF solution of  $\text{Fe}(\text{NO}_3)_3$ .

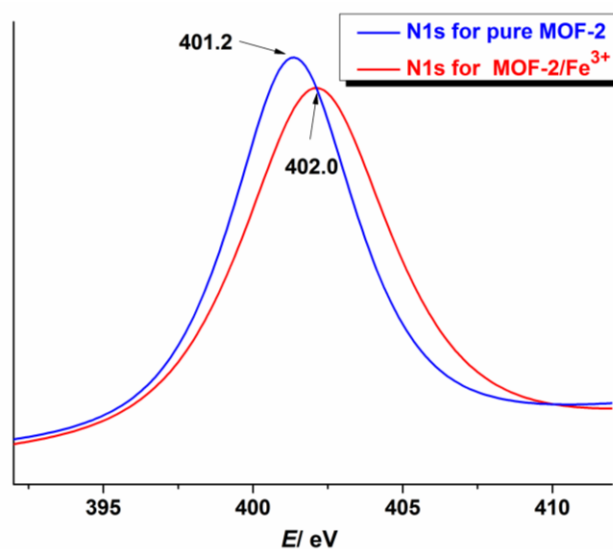

**Figure S20.** XPS spectra of the **2** (blue) and  $\text{Fe}^{3+}$ -incorporated **2** (red) activated in 0.01 mol/L DMF solution of  $\text{Fe}(\text{NO}_3)_3$ .

**12. The UV-Vis spectra of ligands, NM, and complexes 1-2 in DMF solution.**

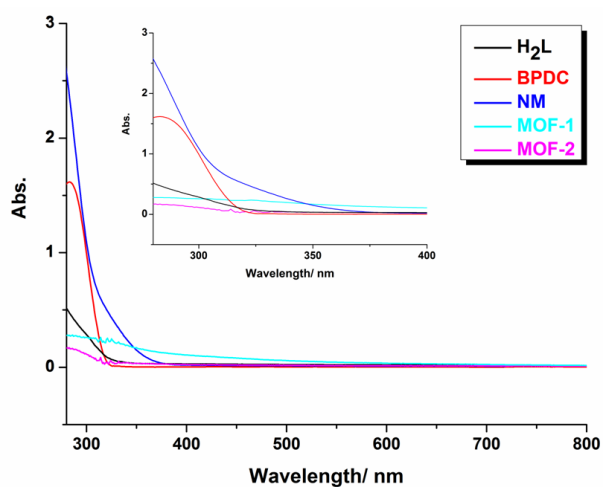

**Figure S21.** The UV-Vis spectra of ligands, NM, and complexes **1** and **2** in DMF solution. The inset demonstrates the absorption spectra in the range of 280-400 nm.

**13. The ICP results of complexes 1-2 after treated with  $\text{Fe}^{3+}$  for 12 hours.**

**Table S3**

|                                                                    | MOF-1/ $\mu\text{M}$ | MOF-2/ $\mu\text{M}$ |
|--------------------------------------------------------------------|----------------------|----------------------|
| Initial value/ $\text{Fe}^{3+}$                                    | 0.75                 | 0.75                 |
| After treated with $\text{Fe}^{3+}$ for 12 hours/ $\text{Fe}^{3+}$ | 0.34                 | 0.52                 |

**14. The detection limit table of selected luminescent Ln-MOFs materials for Fe<sup>3+</sup>.**

**Table S4**

| Ln-MOF luminescent materials                                            | substrates       | detection<br>limit/(mol/L) | ref |
|-------------------------------------------------------------------------|------------------|----------------------------|-----|
| Tb-DSOA                                                                 | Fe <sup>3+</sup> | 10 <sup>-6</sup>           | 26  |
| [(CH <sub>3</sub> ) <sub>2</sub> NH <sub>2</sub> ] [Tb(bptc)] xsolvents | Fe <sup>3+</sup> | 10 <sup>-5</sup>           | 27  |
| [Eu(HL)(H <sub>2</sub> O) <sub>2</sub> ] 2H <sub>2</sub> O              | Fe <sup>3+</sup> | 10 <sup>-6</sup>           | 28  |
| EuL                                                                     | Fe <sup>3+</sup> | 10 <sup>-4</sup>           | 29  |
| [Eu(BTPCA)(H <sub>2</sub> O)] 2DMF 3H <sub>2</sub> O                    | Fe <sup>3+</sup> | 10 <sup>-5</sup>           | 30  |
| <b>Our work</b>                                                         | Fe <sup>3+</sup> | 5×10 <sup>-7</sup>         |     |

## References

1. International Tables for X-Ray Crystallography; Kynoch Press: Birmingham, England, 1952; Vol. III.
2. SAINT, version 6.02; Bruker AXS: Madison, WI, 1999.
3. Sheldrick, G. M. SADABS: Empirical Absorption Correction-Program; University of Göttingen: Göttingen, Germany, 1997.
4. XPREP, version 5.1; Siemens Industrial Automation Inc.: Madison, WI, 1995.
5. Sheldrick, G. M. SHELXTL Reference Manual, version 5.1; Bruker AXS: Madison, WI, 1997.
6. Sheldrick, G. M. SHELXL-97: Program for Crystal Structure Refinement; University of Göttingen: Göttingen, Germany, 1997.
